# Supplementary material
Source: PubMed Central journal article supplement (PMC4533251)
Supplement: peds.2014-0628_peds.2014-0628SupplementaryData.pdf [file peds.2014-0628_peds.2014-0628SupplementaryData.pdf]

## Supplemental Information

**SUPPLEMENTAL TABLE 5** Model Fit Criteria for Latent Class Analysis, Fitting the Number of Trajectories

| Number of Trajectories | BIC Value  | 2( $\Delta$ BIC) |
|------------------------|------------|------------------|
| 1                      | -41 632.64 | —                |
| 2                      | -40 173.68 | 2917.92          |
| 3                      | -39 740.06 | 867.24           |
| 4                      | -39 570.33 | 339.46           |
| 5                      | -39 473.14 | 194.38           |
